# Supplementary material for: Self-Management Nursing Intervention for Controlling Glucose among Diabetes: A Systematic Review and Meta-Analysis
Source: MDPI journal article supplement (doi:10.3390/ijerph182312750), 2021-12-03
Supplement: s1 [file s1]

Supplementary S1. Search strategy and number of searches by DB

| DB            | Search strategy                                                                           | number of searches |
|---------------|-------------------------------------------------------------------------------------------|--------------------|
| Korean        | RISS                                                                                      | 26                 |
|               | DBpia                                                                                     | 12                 |
|               | KISS                                                                                      | 6                  |
|               | Kyobo scholar                                                                             | 4                  |
|               | E-article                                                                                 | 3                  |
| International | diabetic patients' AND 'nursing interventions'                                            | 1                  |
|               | diabets AND 'nurse case management'                                                       | 5                  |
|               | Clinicalkey                                                                               | 2                  |
|               | Diabetes Research and Clinical Practice' (저널내 검색)<br>AND 'nursing interventions' OR HbA1C | 5                  |
|               | EBSCOhost                                                                                 | 11                 |
|               | CINAHL                                                                                    |                    |
|               | Plus with FullText                                                                        |                    |
|               | MEDLINE                                                                                   | 8                  |
|               | (EBSCO)                                                                                   |                    |
|               | PML                                                                                       | 4                  |
|               | diabetic patients' AND 'nursing interventions' AND<br>(HbA1C OR Glucose OR 'blood sugar') | 4                  |
|               | EMBASE                                                                                    | 5                  |
|               | OVID                                                                                      | 20                 |
|               | goggle Scholar                                                                            | 9                  |
|               | PQDT                                                                                      | 6                  |
| Total         |                                                                                           | 127                |

*Notes.* DB: data base, RISS: Research Information Sharing Service, KISS: Korean studies Information Service System, CINAHL: Cumulative Index to Nursing and Allied Health Literature, MEDLINE: National Library of Medicine's (NLM) premier bibliographic database, PQDT: ProQuest Dissertations and Theses.
